# Supplementary material for: The first crystallographic observation of up to the third hydration layer of Cu(II) ion in an unusual ‘water-cation layer’ templated by an Anderson polyoxometallate
Source: Royal Society of Chemistry journal article supplement (doi:10.1039/b910732k), 2009-01-01
Supplement: b910732k.pdf [file b910732k.pdf]

## Supporting Information for the paper entitled

### The first crystallographic observation of up to third hydration layer of Cu(II) ion in an unusual 'water-cation layer' templated by an Anderson polyoxometallate

Mahammad Ali\*, Daipayan Dutta, Surajit Biswas, Jaromir Marek and Atish Dipankar Jana\*

#### *Experimental Section*

0.004 M (0.92 g) of  $\text{H}_2\text{TeO}_4 \cdot 2\text{H}_2\text{O}$ , 0.0042 M (1.016 g) of  $\text{Na}_2\text{MoO}_4 \cdot 2\text{H}_2\text{O}$ , 4 M (8 ml) HCl, 0.0093 M (0.692 g) KCl, 3 mmol (0.595 g) 1,10-phenanthroline and 1 mmol (0.242 g)  $\text{CuNO}_3 \cdot 3\text{H}_2\text{O}$  were added in 40 ml  $\text{H}_2\text{O}$  and stirred for 2.5 h. Then the mixture was transferred to a Teflon bomb and kept in oven at  $160^\circ\text{C}$  for 6 days. The green solution obtained on cooling to room temperature in steps of  $5^\circ\text{C}$  was filtered and allowed to undergo slow evaporation at ambient temperature. Green hexagonal crystals suitable for X-ray diffraction were obtained in 15 days.

Crystal data: Compound 1:  $2(\text{C}_{36}\text{H}_{24}\text{CuN}_6)$ ,  $\text{Mo}_6\text{O}_{24}\text{Te}$ ,  $\text{CuH}_{12}\text{O}_6$ ,  $27(\text{H}_2\text{O})$ ,  $M_r = 2953.64$ , Trigonal,  $P\bar{3}1c(\text{No.163})$ ,  $a = 17.2848(6)$ ,  $b = 17.2848(6)$ ,  $c = 19.2560(11)$  Å;  $\alpha = \beta = 90^\circ$ ,  $\gamma = 120^\circ$ ;  $V = 4982.3(4)$  Å<sup>3</sup>,  $Z = 2$ ,  $D(\text{calc})[\text{g}/\text{cm}^3] = 1.960$ , Crystal Size[mm] =  $0.20 \times 0.30 \times 0.30$ ;  $\mu(\text{MoK}\alpha) [\text{mm}^{-1}] = 1.754$ ,  $F(000) = 2954$ . A total of 37123 reflections were collected and 2951 Unique  $R = 0.056$ ,  $wR_2 = 0.1353$ ,  $S = 1.15$ . Observed data [ $I > 2.0\sigma(I)$ ] = 2580. diffractometer Kuma KM-4 equipped with a CCD detector using monochromated (monochromator Enhance, Oxford Diffraction)  $\text{MoK}\alpha$  ( $\lambda = 0.71073$ ) at 120(2) K. diffractometer Kuma KM-4 equipped with a CCD detector using monochromated (monochromator Enhance, Oxford Diffraction)  $\text{MoK}\alpha$  ( $\lambda = 0.71073$ ) at 120(2) K. Additional Crystallographic data are available (CCDC 706251) from the Cambridge Crystallographic Data Centre, 12 Union Road, Cambridge CB21EZ, UK; fax: (+44) 1223-336-033; or deposit@ccdc.cam.ac.uk).

**Table S1 – Details of hydrogen bonding parameter of the complex**

| D-H...A                    | d(D-H)(Å)        | d(H...A)(Å)      | d(D...A)(Å)     | <(DHA)(°)     |
|----------------------------|------------------|------------------|-----------------|---------------|
| O(1)-H(1W)...O(8)#1        | 0.918(13)        | 1.771(12)        | 2.683(5)        | 172(4)        |
| O(1)-H(1V)...O(4)#1        | 0.950(13)        | 1.647(16)        | 2.524(6)        | 152(3)        |
| O(2)-H(2V)...O(10)         | 0.93(3)          | 1.83(3)          | 2.754(7)        | 174(2)        |
| O(2)-H(2W)...O(5)#2        | 0.95(6)          | 1.86(6)          | 2.813(8)        | 178(11)       |
| O(3)-H(3W)...O(5)          | 0.93(3)          | 1.83(3)          | 2.753(8)        | 170(7)        |
| O(3)-H(3V)...O(3)#3        | 0.92(2)          | 1.70(2)          | 2.614(10)       | 176(7)        |
| O(3)-H(3X)...O(3)#4        | 0.921(15)        | 1.973(15)        | 2.889(12)       | 173(2)        |
| <b>O(4)-H(4W)...O(2)</b>   | <b>0.916(15)</b> | <b>1.504(15)</b> | <b>2.386(8)</b> | <b>160(3)</b> |
| O(5)-H(5W)...O(6)          | 0.915(15)        | 1.81(3)          | 2.710(7)        | 167(5)        |
| O(5)-H(5V)...O(9)#5        | 0.935(15)        | 2.03(3)          | 2.956(6)        | 171(5)        |
| O(6)-H(6W)...O(4)          | 0.913(14)        | 1.722(15)        | 2.629(7)        | 172(4)        |
| <b>O(6)-H(6V)...O(1)#1</b> | <b>0.969(13)</b> | <b>1.870(14)</b> | <b>2.836(7)</b> | <b>174(7)</b> |

---

Symmetry transformations used to generate equivalent atoms:

#1 -y,x-y,z #2 -x+y,y,-z+1/2 #3 -y+1,-x+1,-z+1/2  
#4 x,x-y,-z+1/2 #5 y,x,z-1/2

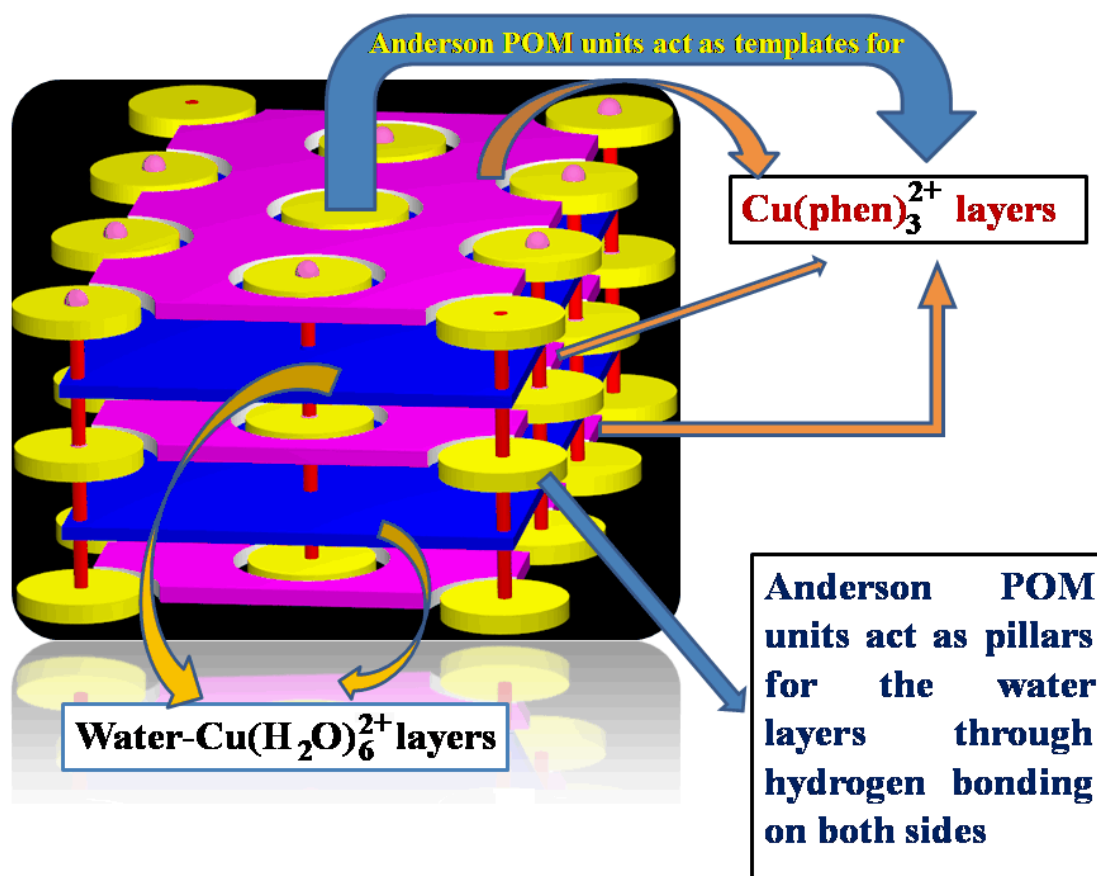

**Figure S1:** The overall supramolecular assembly in complex **1** depicting the interpenetration of 3D pillar-layered hydrogen bonded  $[\text{Cu(H}_2\text{O)}_6]^{2+}$ -water-POM network and  $\pi$ - $\pi$  layer of  $[\text{Cu(phen)}_3]^{2+}$  units

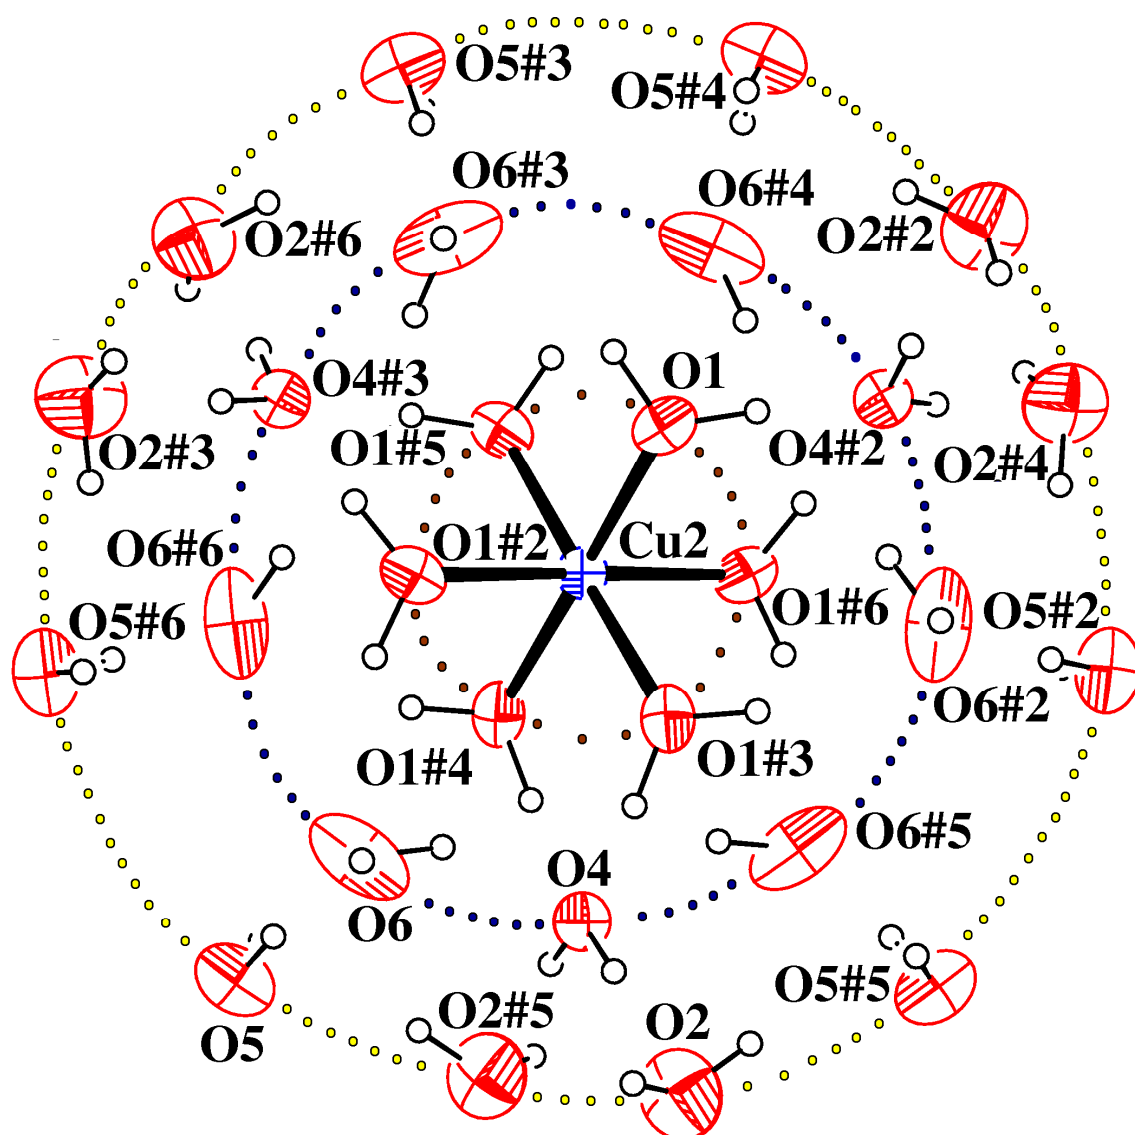

**Figure S2:** The ORTEP diagram(30% ellipsoidal probability) of the hydration layers around  $[\text{Cu}(\text{H}_2\text{O})_6]^{2+}$  unit. {#1 = -y,x-y,z; #2=-x+y,-x,z ;#3=-x,-y,1-z ;#4= y,-x+y,1-z ;#5= x-y,x,1-z }

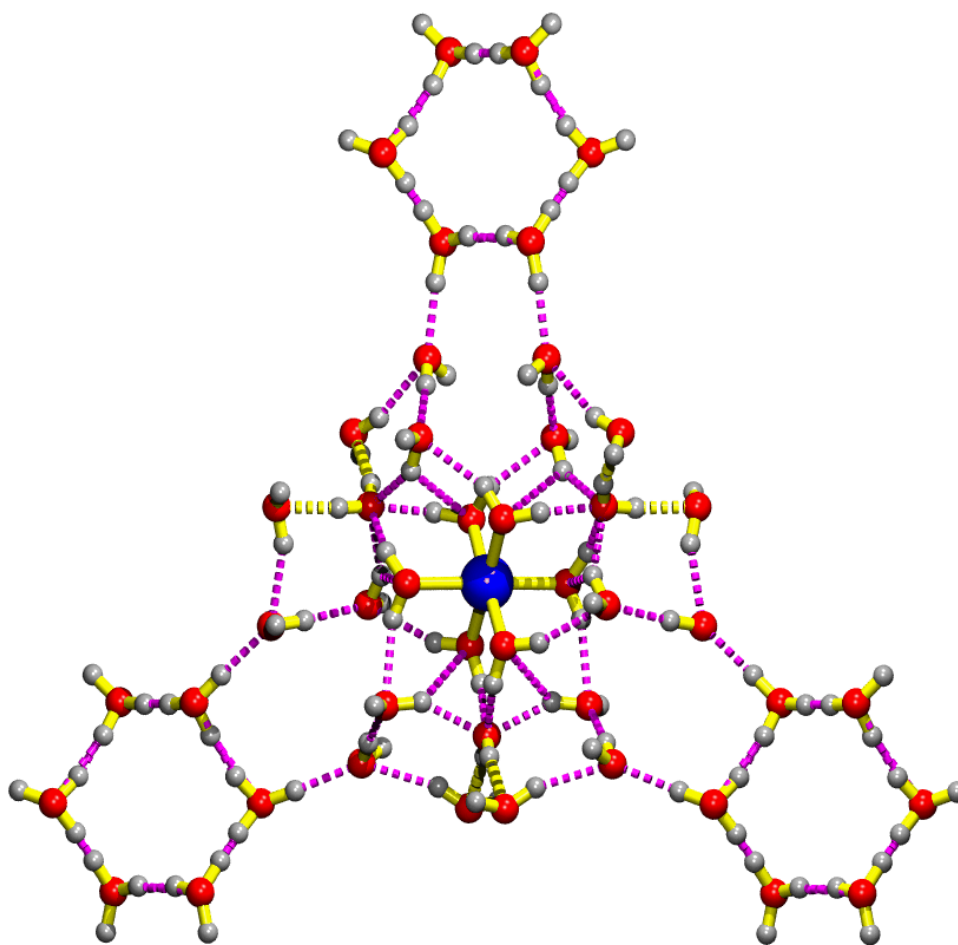

**Figure S3:** View showing the hydrogen bonded network of three water hexamer with the central hydrated Cu(II) cation.

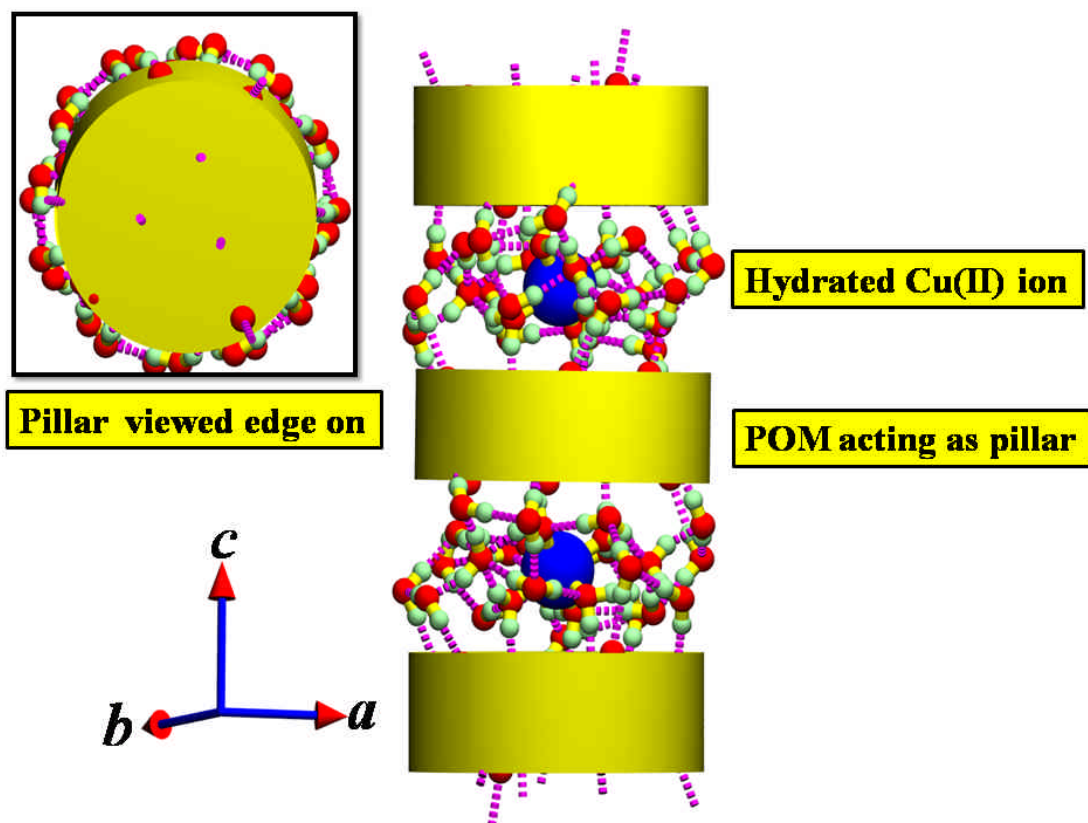

**Figure S4:** The view showing the pillar formed through the hydrogen bonding water molecules with the POM units (shown in yellow).
